# Supplementary material for: Synthesis and characterization of organo-scandium and yttrium complexes stabilized by phosphinoamide ligands
Source: Royal Society of Chemistry journal article supplement (doi:10.1039/c1dt11501d), 2011-12-06
Supplement: c1dt11501d.pdf [file c1dt11501d.pdf]

## Supporting Information

### Synthesis and Characterization of Organo-Scandium and Yttrium Complexes Stabilized by Phosphinoamide Ligands

Nathan R. Halcovitch and Michael D. Fryzuk\*

Department of Chemistry  
The University of British Columbia  
2036 Main Mall  
Vancouver, BC, Canada  
V6T 1Z1

**NMR Spectroscopy:** Characterization of phosphinoamide supported yttrium-alkyl complexes.

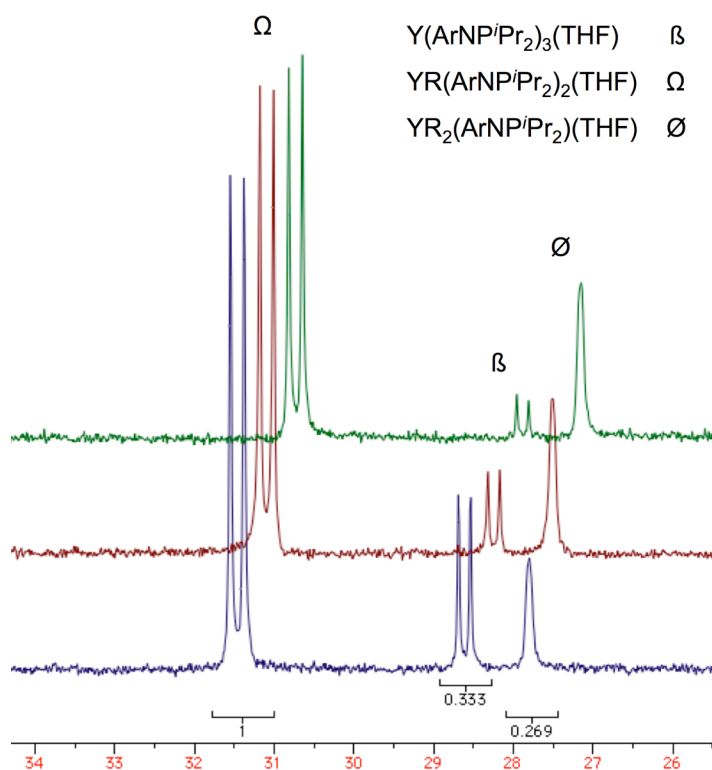

**Figure S1:**  $^{31}\text{P}\{^1\text{H}\}$  NMR spectrum (160 MHz, 298K,  $\text{C}_6\text{D}_6$ ): 1:1 ( $\text{YR}_3(\text{THF})_2$ :  $\text{Y}(\text{ArNP}^i\text{Pr}_2)_3(\text{THF})$ ) [Blue], 2:1 ( $\text{YR}_3(\text{THF})_2$ :  $\text{Y}(\text{ArNP}^i\text{Pr}_2)_3(\text{THF})$ ) [Red], 3:1 ( $\text{YR}_3(\text{THF})_2$ :  $\text{Y}(\text{ArNP}^i\text{Pr}_2)_3(\text{THF})$ ) [Green]; where  $\text{R} = \text{CH}_2\text{SiMe}_3$  and  $\text{Ar} = 3,5\text{-dimethylphenyl}$ .

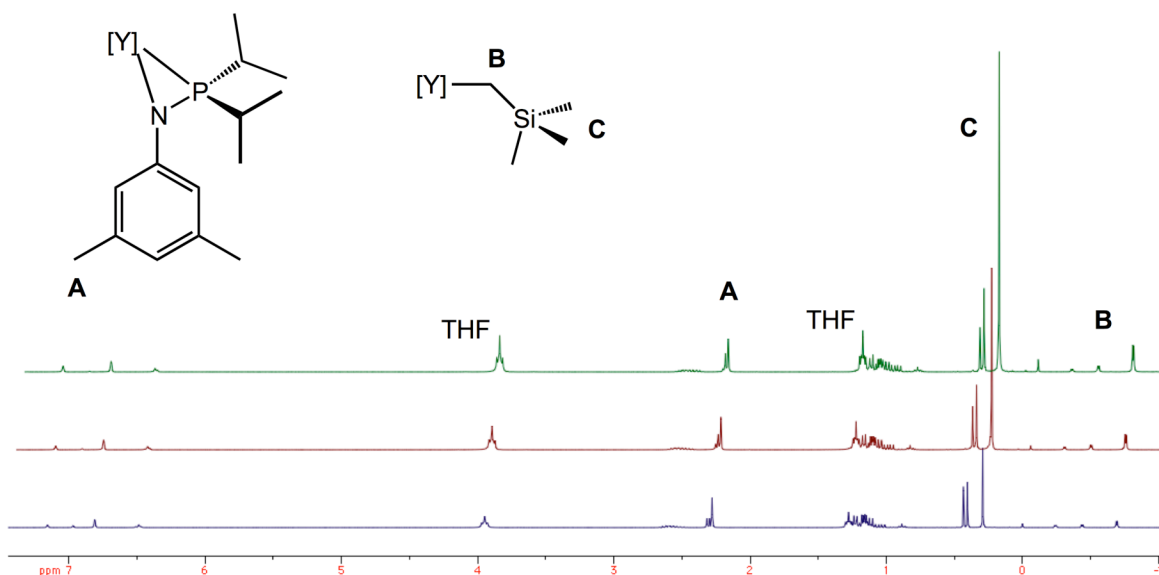

**Figure S2:** Full  $^1\text{H}$  NMR spectra (400 MHz, 298K,  $\text{C}_6\text{D}_6$ ): 1:1 ( $\text{YR}_3(\text{THF})_2$ :  $\text{Y}(\text{ArNP}^i\text{Pr}_2)_3(\text{THF})$ ) [Blue], 2:1 ( $\text{YR}_3(\text{THF})_2$ :  $\text{Y}(\text{ArNP}^i\text{Pr}_2)_3(\text{THF})$ ) [Red], 3:1 ( $\text{YR}_3(\text{THF})_2$ :  $\text{Y}(\text{ArNP}^i\text{Pr}_2)_3(\text{THF})$ ) [Green]; where  $\text{R} = \text{CH}_2\text{SiMe}_3$  and  $\text{Ar} = 3,5\text{-dimethylphenyl}$ .

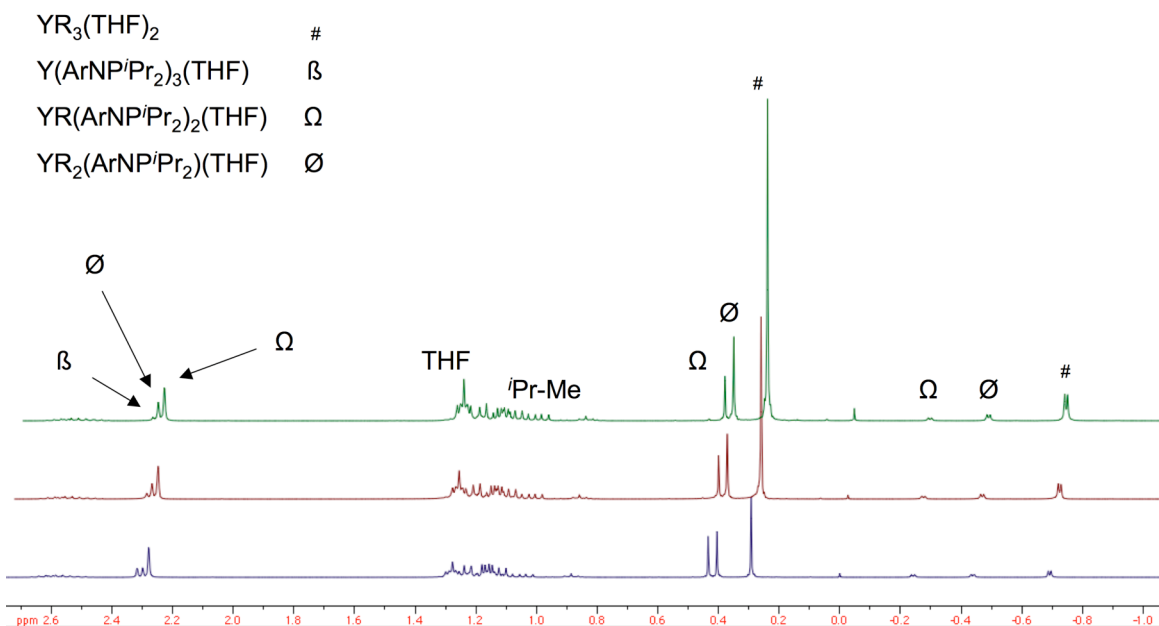

**Figure S3:**  $^1\text{H}$  NMR spectra of the region from -1.0 ppm to 2.6 ppm (400 MHz, 298K,  $\text{C}_6\text{D}_6$ ): 1:1 ( $\text{YR}_3(\text{THF})_2$ :  $\text{Y}(\text{ArNP}^i\text{Pr}_2)_3(\text{THF})$ ) [Blue], 2:1 ( $\text{YR}_3(\text{THF})_2$ :  $\text{Y}(\text{ArNP}^i\text{Pr}_2)_3(\text{THF})$ ) [Red], 3:1 ( $\text{YR}_3(\text{THF})_2$ :  $\text{Y}(\text{ArNP}^i\text{Pr}_2)_3(\text{THF})$ ) [Green]; where  $\text{R} = \text{CH}_2\text{SiMe}_3$  and  $\text{Ar} = 3,5\text{-dimethylphenyl}$ .

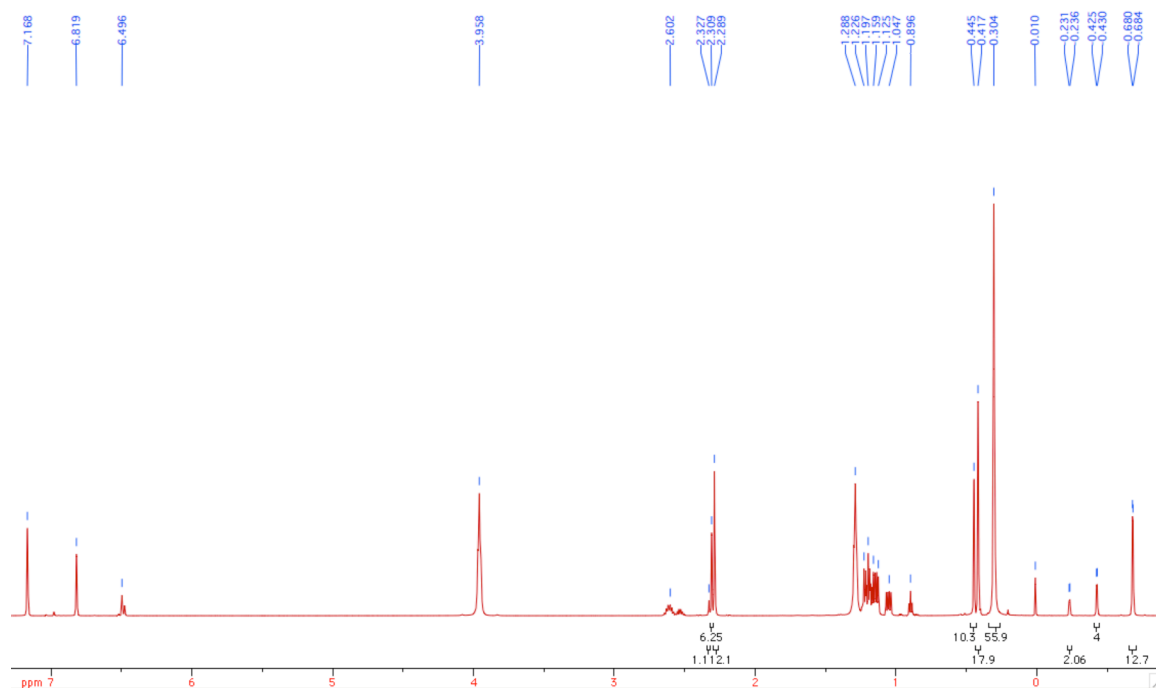

**Figure S4:**  $^1\text{H}$  NMR spectrum (600 MHz, 298K,  $\text{C}_6\text{D}_6$ ) of a solution of 3:1 ( $\text{YR}_3(\text{THF})_2$ :  $\text{Y}(\text{ArNP}^i\text{Pr}_2)_3(\text{THF})$ ) which displays the integrations to support assignments of  $\text{YR}(\text{ArNP}^i\text{Pr}_2)_2(\text{THF})$  and  $\text{YR}_2(\text{ArNP}^i\text{Pr}_2)(\text{THF})$  where  $\text{R} = \text{CH}_2\text{SiMe}_3$  and  $\text{Ar} = 3,5$ -dimethylphenyl.

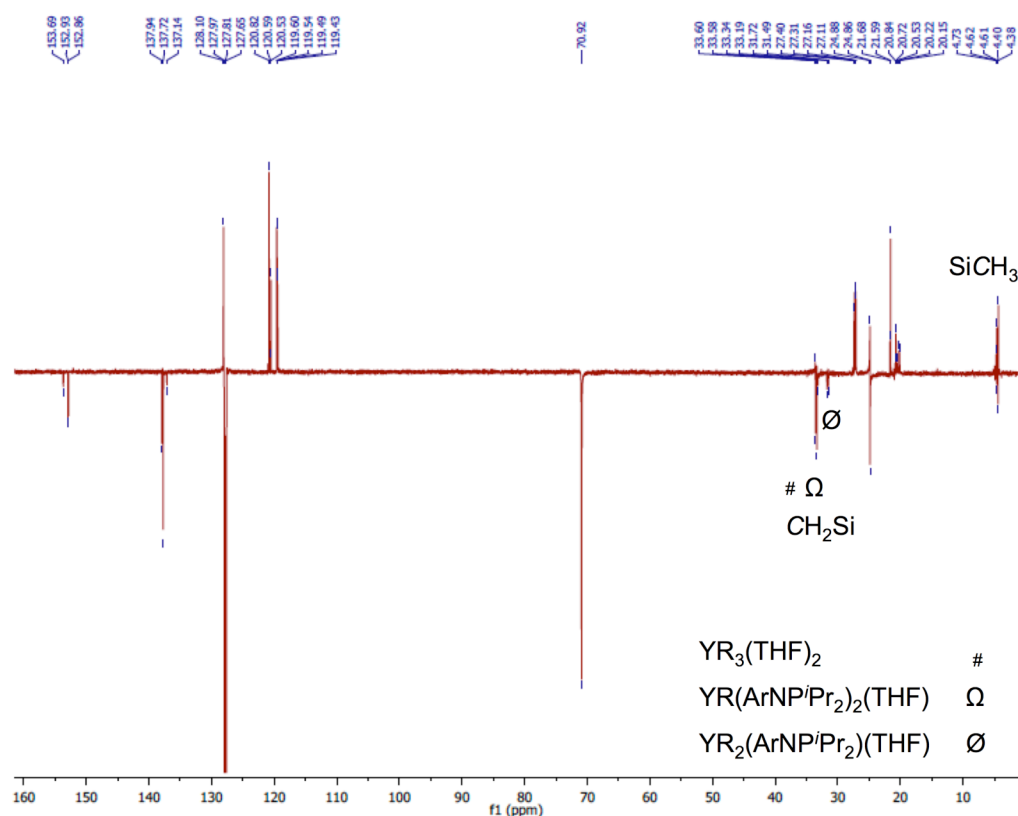

**Figure S5:**  $^{13}\text{C}$ -APT (attached proton test) NMR spectrum (150 MHz, 298K,  $\text{C}_6\text{D}_6$ ) of a solution of 3:1 ( $\text{YR}_3(\text{THF})_2$ :  $\text{Y}(\text{ArNP}^i\text{Pr}_2)_3(\text{THF})$ ) which displays quaternary carbons and methylene carbons in a negative phase, and methine and methyl carbons in a positive phase.

### NMR Spectroscopic Analysis:

Figures S1 and S2 display the consumption of  $(\text{ArNP}^i\text{Pr}_2)_3\text{Y}(\text{THF})$  as  $\text{YR}_3(\text{THF})_2$  is added to a benzene solution. The generation of two new species is apparent, in particular by inspection of the  $^{31}\text{P}\{^1\text{H}\}$  NMR (Figure S1) spectrum and by the resonances labeled **C** in the  $^1\text{H}$  NMR spectrum (Figure S2). Integration of certain resonances in the  $^1\text{H}$  NMR spectrum presented in Figure S4 allows for comparison of the tolyl-resonances (labeled **A** in Figure S2) of the ligand-backbone and the alkyl resonances (labeled **B** and **C** in Figure S2). These integrations support our assignments of the species as  $\text{YR}(\text{ArNP}^i\text{Pr}_2)_2(\text{THF})$  and  $\text{YR}_2(\text{ArNP}^i\text{Pr}_2)(\text{THF})$ , which are present in a ratio of approximately 1:1. Figures S5 and S6 show that the  $^1\text{H}$  resonances assigned as  $\text{YCH}_2\text{SiMe}_3$  correlate to methylene-type carbons, while we have observed coupling constants of  $^2J_{\text{HY}} = 3 \text{ Hz}$  in the  $^1\text{H}$  NMR spectrum for  $\text{YCH}_2\text{SiMe}_3$  resonances (labeled **B** in Figure S2), we are not able to resolve any  $^1J_{\text{CY}}$  coupling constants in Figure S5.

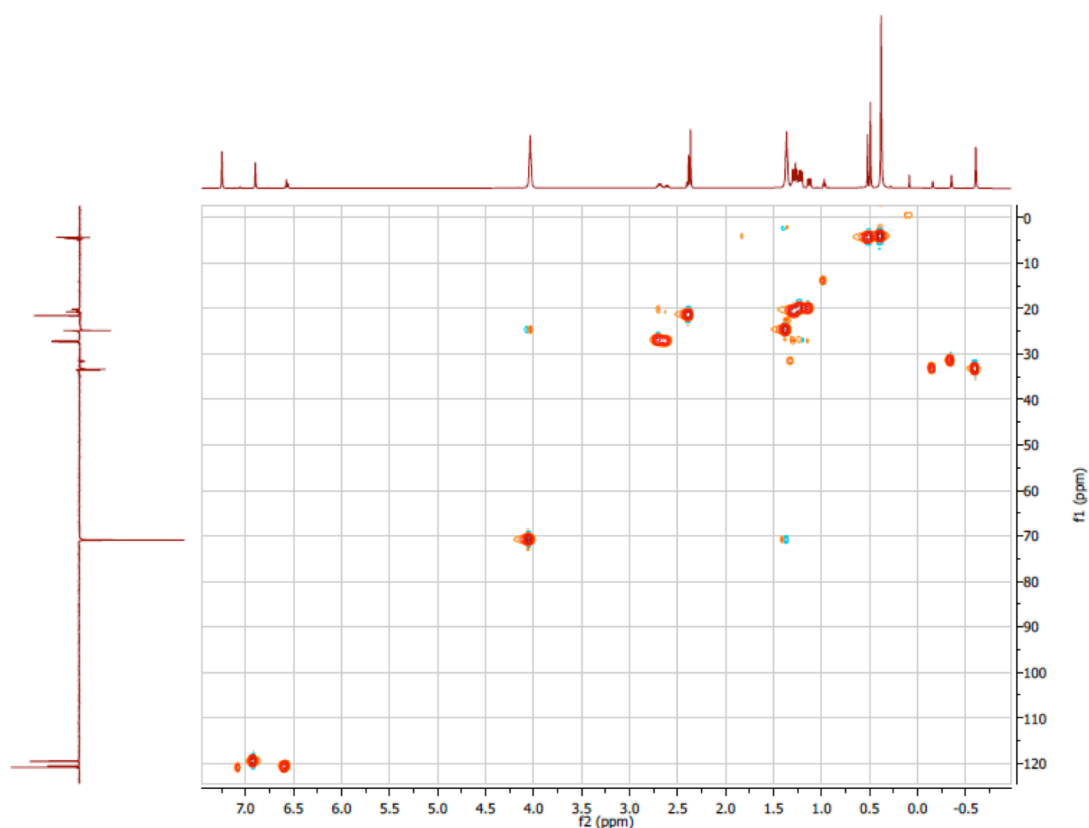

**Figure S6:** HSQC (Heteronuclear Single-Quantum Correlation) NMR spectrum (298K,  $\text{C}_6\text{D}_6$ ) of a solution of 3:1 ( $\text{YR}_3(\text{THF})_2$ :  $\text{Y}(\text{ArNP}^i\text{Pr}_2)_3(\text{THF})$ ) which shows one-bond correlations between signals in the  $^1\text{H}$  NMR spectrum (x-axis) and signals in the  $^{13}\text{C}$ -APT spectrum (y-axis).

**NMR Spectroscopy:** Variable Temperature NMR studies of **3**,  
Sc(ArNP<sup>i</sup>Pr<sub>2</sub>)<sub>2</sub>(CH<sub>2</sub>SiMe<sub>3</sub>)(THF), dissolved in THF-*d*<sub>8</sub>.

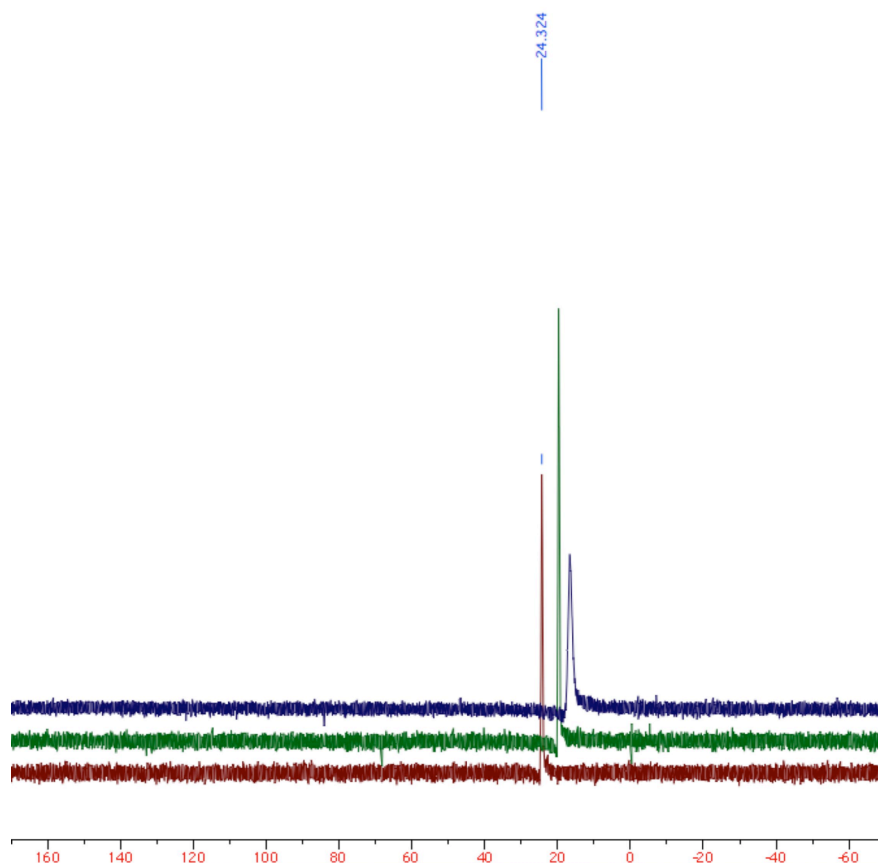

**Figure S7:** Stackplot of <sup>31</sup>P NMR spectra (x-axis in ppm) of complex **3** (THF-*d*<sub>8</sub>, 298K, 243K, 203K).

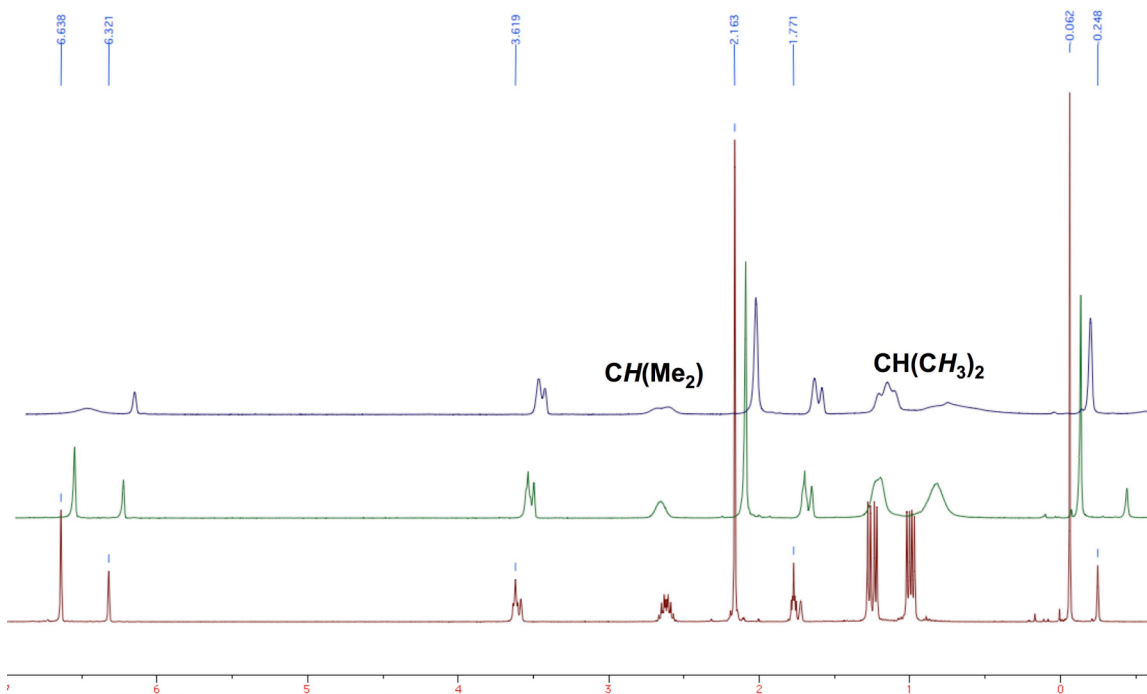

**Figure S8:** Stackplot of  $^1\text{H}$  NMR spectra (x-axis in ppm) of complex **3** ( $\text{THF-}d_8$ , 298K, 243K, 203K).

### Details of X-ray Crystallographic Studies

Suitable single crystals were selected, coated in Fomblin oil and mounted on a glass fiber. X-ray data were collected on a Bruker X8 Apex II diffractometer with graphite-monochromated Mo  $K\alpha$  radiation ( $\lambda = 0.71073 \text{ \AA}$ ) integrated using the Bruker SAINT software package.<sup>1</sup> Crystals of **3** were non-merohedrally twinned. Both twin domains are related by a  $180^\circ$  rotation about the c-axis (1 0 0 axis). Out of 41335 measured reflections, 14258 data (4642 unique) involved domain 1 only, 14249 data (4674 unique) involved domain 2 only and 12828 data (4403 unique) were part of both domains. The twinned structure was solved by direct methods using the non-overlapping reflections in an HKL4-formatted data set and refined using an HKL5-formatted data set that also included the overlapping reflections. The reflection data were prepared for refinement using the TWINABS program.<sup>2</sup> The absorption correction for **2b** was performed using the multi-scan technique (SADABS).<sup>3</sup> Structure **2b** was solved by direct methods and refined using all reflections with the SHELX-97 program package.<sup>4</sup> All non-hydrogen atoms were refined anisotropically. For a disordered  $\text{Et}_2\text{O}$  or pentane molecule in **2b** and no satisfactory model was obtained. For further refinement, the contribution of this solvent molecule was subtracted from the reflection data using the SQUEEZE<sup>5</sup> routine in the PLATON program package.<sup>6</sup> All hydrogen atoms were placed in calculated positions and assigned to an isotropic displacement parameter. Structures were solved and refined using the WinGX (version 1.80.05) software package.<sup>7</sup>

**Table S1:** Crystal structure and refinement data

|                                                                                                                                                    | (ArNP <sup>i</sup> Pr <sub>2</sub> ) <sub>3</sub> Y(THF)         | (ArNP <sup>i</sup> Pr <sub>2</sub> ) <sub>2</sub> Sc(CH <sub>2</sub> SiMe <sub>3</sub> )(THF) |
|----------------------------------------------------------------------------------------------------------------------------------------------------|------------------------------------------------------------------|-----------------------------------------------------------------------------------------------|
| Chemical formula                                                                                                                                   | C <sub>46</sub> H <sub>77</sub> N <sub>3</sub> OP <sub>3</sub> Y | C <sub>36</sub> H <sub>65</sub> N <sub>2</sub> OP <sub>2</sub> ScSi                           |
| M <sub>r</sub>                                                                                                                                     | 869.93                                                           | 676.89                                                                                        |
| Crystal system                                                                                                                                     | Monoclinic                                                       | Monoclinic                                                                                    |
| Space group                                                                                                                                        | P 21/n                                                           | P 21/c                                                                                        |
| a / Å                                                                                                                                              | 17.0260(9)                                                       | 11.5520(8)                                                                                    |
| b / Å                                                                                                                                              | 13.4302(6)                                                       | 19.4650(15)                                                                                   |
| c / Å                                                                                                                                              | 23.0701(13)                                                      | 18.3410(11)                                                                                   |
| a / °                                                                                                                                              | 90                                                               | 90                                                                                            |
| b / °                                                                                                                                              | 104.7330(10)                                                     | 98.253(3)                                                                                     |
| g / °                                                                                                                                              | 90                                                               | 90                                                                                            |
| Volume / Å <sup>3</sup>                                                                                                                            | 5101.8(5)                                                        | 4081.4(5)                                                                                     |
| T / K                                                                                                                                              | 100(2)                                                           | 100(2)                                                                                        |
| Z                                                                                                                                                  | 4                                                                | 4                                                                                             |
| μ / mm <sup>-1</sup>                                                                                                                               | 1.27                                                             | 0.315                                                                                         |
| ρ (calcd) / g/cm <sup>3</sup>                                                                                                                      | 1.133                                                            | 1.102                                                                                         |
| F(000)                                                                                                                                             | 1864                                                             | 1472                                                                                          |
| Absorption Correction                                                                                                                              | Multi-scan                                                       | Semi-empirical from equivalents                                                               |
| Crystal size / mm <sup>3</sup>                                                                                                                     | 0.28 x 0.20 x 0.14                                               | 0.26 x 0.24 x 0.20                                                                            |
| Wavelength / Å                                                                                                                                     | 0.71073                                                          | 0.71073                                                                                       |
| Reflections collected                                                                                                                              | 35458                                                            | 41335                                                                                         |
| Independent reflections                                                                                                                            | 9023 [R(int) = 0.0368]                                           | 13719 [R(int) = 0.0502]                                                                       |
| Data / restraints / parameters                                                                                                                     | 9023 / 0 / 529                                                   | 13719 / 0 / 404                                                                               |
| Goodness-of-fit on F <sup>2</sup>                                                                                                                  | 1.075                                                            | 1.09                                                                                          |
| R indices [I > 2σ(I)] (R1, wR2)                                                                                                                    | 0.0327, 0.0859                                                   | 0.0441, 0.1230                                                                                |
| R indices [all data] (R1, wR2)                                                                                                                     | 0.0463, 0.0908                                                   | 0.0519, 0.1266                                                                                |
| Completeness to theta = 25.16°                                                                                                                     | 99.80%                                                           | 98.70%                                                                                        |
| Max. and min. transmission                                                                                                                         | 0.837 and 0.745                                                  | 0.9396 and 0.9225                                                                             |
| Theta range for data collection                                                                                                                    | 1.34 to 25.06°                                                   | 1.53 to 25.16°                                                                                |
| R1 = Σ   Fo  -  Fc   / Σ Fo ; wR2 = [Σ (w(Fo <sup>2</sup> - Fc <sup>2</sup> ) <sup>2</sup> ) / Σ w(Fo <sup>2</sup> ) <sup>2</sup> ] <sup>1/2</sup> |                                                                  |                                                                                               |

Supplementary crystallographic data can be obtained free of charge from the Cambridge Crystallographic Data Centre via [www.ccdc.cam.ac.uk/data\\_request/cif](http://www.ccdc.cam.ac.uk/data_request/cif): CCDC 837086 & CCDC 837087.

## References

- (1) SAINT, Version 7.56, Bruker AXS Inc., Madison, Wisconsin, USA (2008).
- (2) TWINABS, Version 2008/2, Bruker AXS Inc., Madison, Wisconsin, USA (2008).
- (3) SADABS, Bruker area detector scaling and absorption correction - Version 2008/1, Bruker AXS Inc., Madison, Wisconsin, USA (2008).
- (4) G. M. Sheldrick, *Acta Cryst.* 2008, **A64**, 112.
- (5) P. v. d. Sluis, A. L. Spek, *Acta Cryst.* 1990, **A46**, 194.
- (6) A. L. Spek, *J. Appl. Cryst.* 2003, **36**, 7.
- (7) L. J. Farrugia, *J. Appl. Cryst.* 1999, **32**, 837.
